# Supplementary material for: Intensive Care Unit Mortality Trends during the First Two Years of the COVID-19 Pandemic in Greece: A Multi-Center Retrospective Study
Source: MDPI journal article supplement (doi:10.3390/v16040488), 2024-03-22

## Supplementary Materials

**Suppl Table S1.** Multivariate Logistic regression of overall morbidity.

|                                          | Coef. | St.Err. | t-value | p-value | [95% Conf Interval] |        | Sig |
|------------------------------------------|-------|---------|---------|---------|---------------------|--------|-----|
| Age                                      | 1     | .       | .       | .       | .                   | .      | .   |
| ≥65                                      | 2.995 | 0.478   | 6.87    | 0       | 2.191               | 4.095  | *** |
| Sex                                      | 1     | .       | .       | .       | .                   | .      | .   |
| Female                                   | 0.712 | 0.117   | -2.07   | 0.038   | 0.516               | 0.982  | **  |
| Wave                                     | 1     | .       | .       | .       | .                   | .      | .   |
| 2nd wave                                 | 4.138 | 2.184   | 2.69    | 0.007   | 1.471               | 11.643 | *** |
| 3rd wave                                 | 2.966 | 1.502   | 2.15    | 0.032   | 1.099               | 8.001  | **  |
| 4th wave                                 | 5.285 | 2.724   | 3.23    | 0.001   | 1.925               | 14.512 | *** |
| Days from symptom onset to ICU admission | 1.053 | 0.013   | 4.10    | 0       | 1.027               | 1.079  | *** |
| APACHE II                                | 1.09  | 0.016   | 5.97    | 0       | 1.059               | 1.121  | *** |
| SOFA                                     | 1.248 | 0.038   | 7.31    | 0       | 1.176               | 1.325  | *** |
| BMI                                      | 1     | .       | .       | .       | .                   | .      | .   |
| 25-29                                    | 1.455 | 0.281   | 1.94    | 0.053   | 0.996               | 2.125  | *   |
| 30-34                                    | 2.003 | 0.434   | 3.20    | 0.001   | 1.309               | 3.063  | *** |
| 35-39                                    | .804  | 0.245   | -0.72   | 0.473   | 0.443               | 1.46   | .   |
| ≥40                                      | 2.144 | 0.693   | 2.36    | 0.018   | 1.137               | 4.041  | **  |
| Total comorbidities                      | 1     | .       | .       | .       | .                   | .      | .   |
| ≥2                                       | 1.342 | 0.206   | 1.92    | 0.055   | 0.993               | 1.814  | *   |
| Smoking status                           | 1     | .       | .       | .       | .                   | .      | .   |
| Current                                  | 1.207 | 0.289   | 0.79    | 0.431   | 0.756               | 1.93   | .   |
| Ex-smoker                                | 1.043 | 0.186   | 0.23    | 0.814   | 0.735               | 1.479  | .   |
| Steroids administration                  | 1     | .       | .       | .       | .                   | .      | .   |
| Dexamethasone                            | 0.675 | 0.134   | -1.98   | 0.048   | 0.458               | 0.997  | **  |
| Vaccination status                       | 1     | .       | .       | .       | .                   | .      | .   |
| Yes                                      | 1.184 | 0.386   | 0.52    | 0.604   | 0.625               | 2.243  | .   |

\*\*\*  $p < 0.01$ , \*\*  $p < 0.05$ , \*  $p < 0.1$

BMI: Body mass index; ICU: Intensive Care Unit; APACHEII: Acute Physiology And Chronic Health Evaluation II; SOFA: Sequential Organ Failure Assessment.

**Suppl. Table S2.** Multivariate Logistic regression of 28-days morbidity.

|                            | Coef. | St.Err. | t-value | p value | [95% Conf Interval] |       | Sig |
|----------------------------|-------|---------|---------|---------|---------------------|-------|-----|
| Age                        | 1     | .       | .       | .       | .                   | .     | .   |
| ≥65                        | 2.459 | 0.413   | 5.36    | 0       | 1.77                | 3.417 | *** |
| Sex                        | 1     | .       | .       | .       | .                   | .     | .   |
| Female                     | 0.896 | 0.146   | -0.67   | 0.5     | 0.651               | 1.233 | .   |
| Wave                       | 1     | .       | .       | .       | .                   | .     | .   |
| 2nd wave                   | 2.022 | 1.076   | 1.32    | 0.186   | 0.712               | 5.74  | .   |
| 3rd wave                   | 1.3   | 0.664   | 0.51    | 0.608   | 0.478               | 3.539 | .   |
| 4th wave                   | 2.232 | 1.146   | 1.56    | 0.118   | 0.816               | 6.108 | .   |
| Days from symptom onset to | 1.054 | 0.012   | 4.51    | 0       | 1.03                | 1.078 | *** |

|                    |       |       |       |       |       |       |     |
|--------------------|-------|-------|-------|-------|-------|-------|-----|
| ICU admission      |       |       |       |       |       |       |     |
| APACHE II          | 1.037 | 0.013 | 2.90  | 0.004 | 1.012 | 1.063 | *** |
| SOFA               | 1.276 | 0.04  | 7.81  | 0     | 1.2   | 1.356 | *** |
| BMI                | 1     | .     | .     | .     | .     | .     |     |
| 25-29              | 0.821 | 0.16  | -1.01 | 0.314 | 0.56  | 1.204 |     |
| 30-34              | 1.286 | 0.273 | 1.19  | 0.236 | 0.848 | 1.949 |     |
| 35-39              | 0.535 | 0.172 | -1.95 | 0.052 | 0.285 | 1.004 | *   |
| ≥40                | 1.201 | 0.389 | 0.56  | 0.572 | 0.636 | 2.265 |     |
| Total              | 1     | .     | .     | .     | .     | .     |     |
| comorbidities      |       |       |       |       |       |       |     |
| ≥2                 | 1.128 | 0.176 | 0.77  | 0.442 | 0.83  | 1.532 |     |
| Smoking status     | 1     | .     | .     | .     | .     | .     |     |
| Current            | 1.358 | 0.321 | 1.29  | 0.196 | 0.855 | 2.157 |     |
| Ex-smoker          | 1.015 | 0.181 | 0.08  | 0.935 | 0.715 | 1.441 |     |
| Steroids           | 1     | .     | .     | .     | .     | .     |     |
| administration     |       |       |       |       |       |       |     |
| Dexamethasone      | 0.993 | 0.195 | -0.04 | 0.971 | 0.676 | 1.459 |     |
| Vaccination status | 1     | .     | .     | .     | .     | .     |     |
| Yes                | 1.415 | 0.415 | 1.18  | 0.237 | 0.796 | 2.514 |     |

\*\*\*  $p < 0.01$ , \*\*  $p < 0.05$ , \*  $p < 0.1$

BMI: Body mass index; ICU: Intensive Care Unit; APACHEII: Acute Physiology And Chronic Health Evaluation II; SOFA: Sequential Organ Failure Assessment.

**Suppl. Table S3.** Multivariate Logistic regression of overall ICU morbidity.

|                                          | Coef. | St.Err. | t-value | p-value | [95% Conf Interval] |        | Sig |
|------------------------------------------|-------|---------|---------|---------|---------------------|--------|-----|
| Age                                      | 1     | .       | .       | .       | .                   | .      |     |
| ≥65                                      | 2.925 | 0.464   | 6.76    | 0       | 2.143               | 3.992  | *** |
| Sex                                      | 1     | .       | .       | .       | .                   | .      |     |
| Female                                   | 0.702 | 0.114   | -2.18   | 0.029   | 0.51                | 0.964  | **  |
| Wave                                     | 1     | .       | .       | .       | .                   | .      |     |
| 2nd wave                                 | 4.413 | 2.335   | 2.81    | 0.005   | 1.564               | 12.449 | *** |
| 3rd wave                                 | 3.114 | 1.585   | 2.23    | 0.026   | 1.148               | 8.447  | **  |
| 4th wave                                 | 5.866 | 3.036   | 3.42    | 0.001   | 2.127               | 16.178 | *** |
| Days from symptom onset to ICU admission | 1.057 | 0.013   | 4.48    | 0       | 1.032               | 1.083  | *** |
| APACHE II                                | 1.074 | 0.015   | 5.24    | 0       | 1.046               | 1.104  | *** |
| SOFA                                     | 1.246 | 0.037   | 7.34    | 0       | 1.175               | 1.321  | *** |
| BMI                                      | 1     | .       | .       | .       | .                   | .      |     |
| 25-29                                    | 1.148 | 0.218   | 0.73    | 0.468   | 0.791               | 1.667  |     |
| 30-34                                    | 1.719 | 0.365   | 2.55    | 0.011   | 1.134               | 2.606  | **  |
| 35-39                                    | .676  | 0.203   | -1.30   | 0.193   | 0.375               | 1.219  |     |
| ≥40                                      | 1.619 | 0.518   | 1.51    | 0.132   | 0.865               | 3.03   |     |
| Total                                    | 1     | .       | .       | .       | .                   | .      |     |
| comorbidities                            |       |         |         |         |                     |        |     |
| ≥2                                       | 1.215 | 0.185   | 1.28    | .2      | 0.902               | 1.638  |     |
| Smoking status                           | 1     | .       | .       | .       | .                   | .      |     |
| Current                                  | 1.315 | 0.311   | 1.16    | 0.246   | 0.827               | 2.09   |     |
| Ex-smoker                                | 0.922 | 0.163   | -0.46   | 0.646   | 0.653               | 1.303  |     |
| Steroids                                 | 1     | .       | .       | .       | .                   | .      |     |
| administration                           |       |         |         |         |                     |        |     |
| Dexamethasone                            | 0.681 | 0.132   | -1.98   | 0.048   | 0.465               | 0.997  | **  |
| Vaccination status                       | 1     | .       | .       | .       | .                   | .      |     |

|     |       |       |      |       |       |       |
|-----|-------|-------|------|-------|-------|-------|
| Yes | 1.284 | 0.413 | 0.78 | 0.437 | 0.684 | 2.411 |
|-----|-------|-------|------|-------|-------|-------|

\*\*\*  $p < 0.01$ , \*\*  $p < 0.05$ , \*  $p < 0.1$

BMI: Body mass index; ICU: Intensive Care Unit; APACHEII: Acute Physiology And Chronic Health Evaluation II; SOFA: Sequential Organ Failure Assessment.

**Suppl. Table S4.** Chi-square test for vaccination status and total number of comorbidities

| Vaccination status                         | Total comorbidities |     |       |
|--------------------------------------------|---------------------|-----|-------|
|                                            | <2                  | ≥2  | Total |
| No                                         | 647                 | 665 | 1312  |
| Yes                                        | 40                  | 77  | 117   |
| Total                                      | 687                 | 742 | 1429  |
| Pearson $\chi^2 = 9.85$ , p value = 0.0017 |                     |     |       |

**Suppl. Table S5.** Two-sample Wilcoxon rank-sum test for APACHE II score between vaccinated and non-vaccinated patients.

| vax      | obs  | rank sum | expected |
|----------|------|----------|----------|
| No       | 1143 | 689228.5 | 702373.5 |
| Yes      | 85   | 65377.5  | 52232.5  |
| combined | 1228 | 754606   | 754606   |

```
unadjusted variance 9950291.25
adjustment for ties  -22594.87
-----
adjusted variance   9927696.38
```

```
Ho: apache(vax==No) = apache(vax==Yes)
      z =  -4.172
      Prob > |z| =  0.0000
```

**Suppl. Table S6.** Two-sample Wilcoxon rank-sum test for SOFA score between vaccinated and non-vaccinated patients.

| vax      | obs  | rank sum | expected |
|----------|------|----------|----------|
| No       | 1123 | 668053.5 | 678853.5 |
| Yes      | 85   | 62182.5  | 51382.5  |
| combined | 1208 | 730236   | 730236   |

```
unadjusted variance 9617091.25
adjustment for ties  -183846.83
-----
adjusted variance   9433244.42
```

```
Ho: sofa(vax==No) = sofa(vax==Yes)
      z =  -3.516
      Prob > |z| =  0.0004
```

**Suppl. Figure S1.** Kaplan-Meier curves for overall mortality over different variables

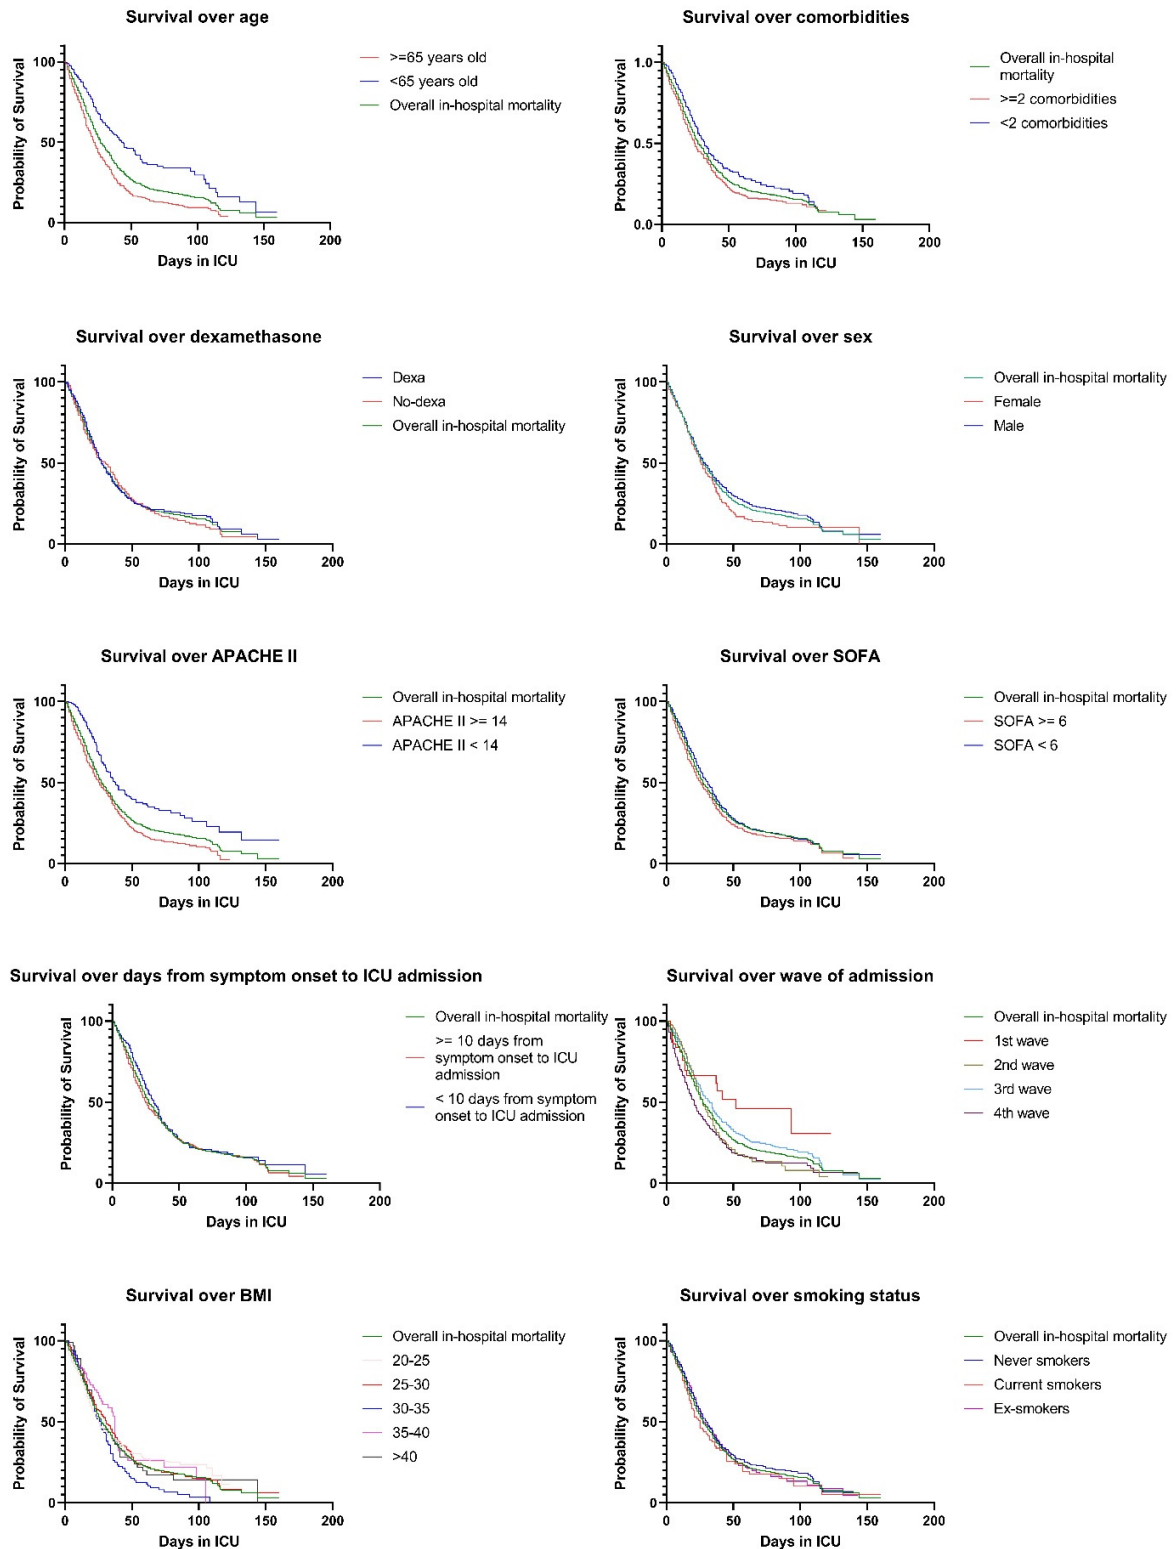

**Suppl Figure S2. Kaplan-Meier curves for 28 days mortality over different variables**

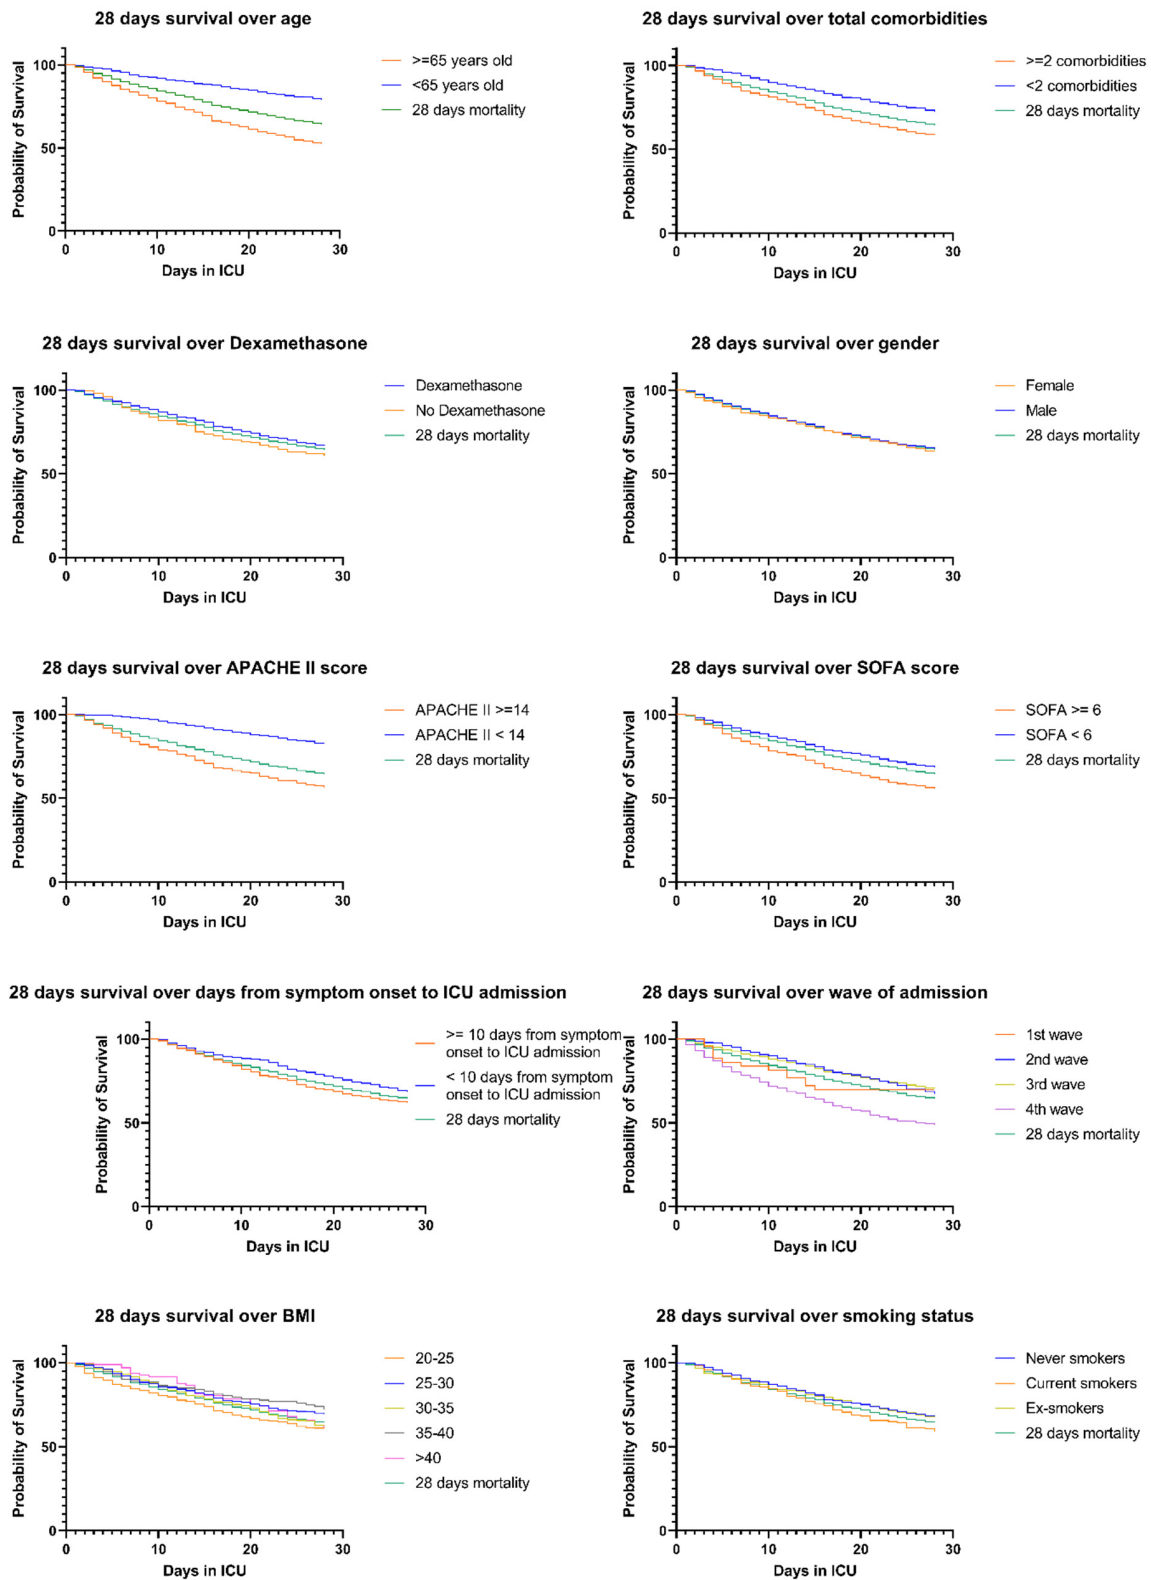

Supplement: s1 [file s1]
